# Supplementary material
Source: PubMed Central journal article supplement (PMC7682135)
Supplement: Supplementary_Data.pdf [file Supplementary_Data.pdf]

Table SI. Comparison of the medical history, clinical manifestations and valve lesions of children with RHD with and without HF.

| Variable                                 | RHD without HF (n=58) | RHD with HF (n=40) |
|------------------------------------------|-----------------------|--------------------|
| History of RF (n=59), n (%)              | 37 (63.7)             | 22 (55.0)          |
| Arthritis (n=54)                         | 34 (58.6)             | 20 (50.0)          |
| Chorea (n=5)                             | 3 (5.2)               | 2 (5.0)            |
| Erythema (n=10)                          | 8 (13.7)              | 2 (5.0)            |
| Skin nodule (n=3)                        | 0 (0.0)               | 3 (7.5)            |
| Clinical manifestations <sup>a</sup>     |                       |                    |
| Onset of symptoms (days), median (range) | 46 (10-98)            | 56 (11-100)        |
| Temperature (°C), median (range)         | 37.6 (36.7-38.5)      | 38.0 (36.6-38.5)   |
| Dyspnea (n=31), n (%)                    | 3 (5.2)               | 28 (70.0)          |
| Intolerance to exercise (n=33), n (%)    | 2 (3.4)               | 31 (77.5)          |
| Palpitation (n=41), n (%)                | 21 (36.2)             | 20 (50.0)          |
| Recurrent ARF <sup>b</sup> (n=11), n (%) | 6 (10.3)              | 5 (12.5)           |
| Valve lesions <sup>c</sup> , n (%)       |                       |                    |
| MR (n=44)                                | 26 (44.8)             | 18 (45.0)          |
| MR & AR (n=32)                           | 17 (29.3)             | 15 (37.5)          |
| MS (n=19)                                | 13 (22.4)             | 6 (15.0)           |
| Mixed valve disease (n=3)                | 2 (3.5)               | 1 (2.5)            |

<sup>a</sup>Twenty-eight RHD children without HF were discovered during auscultation as a part of routine examination. <sup>b</sup>Diagnosed according to revised Jones criteria 2015. <sup>c</sup>There were no significant differences in both groups in regards to the distribution of valve lesions. RHD, rheumatic heart disease; HF, heart failure; RF, rheumatic fever; ARF, acute rheumatic fever; AR, aortic regurgitation; MR, mitral regurgitation; MS, mitral stenosis. Onset of symptoms and temperature are expressed as medians and ranges.

Table SII. Comparison of the laboratory investigations and echocardiography findings of the patient and control groups.

| Variable                                                | Control group (n=44) (a) | RHD without HF (n=58) (b) | RHD with HF (n=40) (c) | P-value                                                      |
|---------------------------------------------------------|--------------------------|---------------------------|------------------------|--------------------------------------------------------------|
| Hb% (g/dl)<br>median (range)                            | 12.3 (9.4-13.8)          | 12.3 (10.6-14.0)          | 11.5 (10.0-14.0)       | <b>c vs. a and b</b><br>0.004                                |
| Platelet count (x10 <sup>3</sup> /ml)<br>median (range) | 195 (125-350)            | 220 (136-424)             | 245 (144-456)          | <b>a vs. b and c</b><br><0.001                               |
| TLC (x10 <sup>3</sup> /ml)<br>median (range)            | 7.2 (4.0-10.4)           | 11.2 (7.3-18.0)           | 14.9 (4.8-29.0)        | <b>a vs. b</b><br><b>b vs. c</b><br><b>a vs. c</b><br><0.001 |
| CRP (mg/dl)<br>median (range)                           | 2.9 (0.6-5.0)            | 34 (12-96)                | 36.5 (12-96)           | <b>a vs. b and c</b><br><0.001                               |
| ASO (IU/ml)<br>median (range)                           | 8.0 (0.4-33)             | 153 (100-400)             | 199 (122-400)          | <b>a vs. b</b><br><b>b vs. c</b><br><b>a vs. c</b><br><0.001 |
| Ejection fraction<br>median (range)                     | 67.0 (63-83)             | 65.5 (63-80)              | 44 (35-55)             | <b>c vs. a and b</b><br><0.001                               |
| Fractional shortening (%)<br>median (range)             | 28.8 (26-44)             | 27.5 (26-41)              | 18.1 (17-27)           | <b>c vs. a and b</b><br><0.001                               |
| MMP-9 (ng/ml)<br>mean ± SD (range)                      | 61.0±22.8 (22-98)        | 356.5±74.7 (199-489)      | 422.3±63.5 (286-520)   | <b>a vs. b</b><br><b>b vs. c</b><br><b>a vs. c</b><br><0.001 |

Kruskal-Wallis test by ranks and one-way analysis of variance (ANOVA) with post hoc test were used to compare medians and means, respectively. P-value indicates the result of the Kruskal-Wallis or ANOVA test. Statistically significant differences are written in bold print. Groups are represented by lowercase letters; above each P-value, the significantly different groups are specified. RHD, rheumatic heart disease; HF, heart failure; Hb%, hemoglobin concentration; ASO, antistreptolysin O; CRP, C reactive protein; MMP-9, matrix metalloproteinase-9; TLC, total leukocyte count; vs., versus.

Table SIII. Cross tabulation of the patients in regards to MMP-9 results.

| MMP-9 (ng/ml) | RHD with HF (n=40) | RHD without HF (n=58) | Total |
|---------------|--------------------|-----------------------|-------|
| ≥386.9        | 38                 | 15                    | 53    |
| <386.9        | 2                  | 43                    | 45    |
| Total         | 40                 | 58                    | 98    |

RHD, rheumatic heart disease; HF, heart failure; MMP-9, matrix metalloproteinase-9.

Table SIV. Correlation between the MMP-9 level and all variables in the studied groups.

| Variable                             | Control group |         | RHD without HF |         | RHD with HF |         |
|--------------------------------------|---------------|---------|----------------|---------|-------------|---------|
|                                      | r             | P-value | r              | P-value | r           | P-value |
| Onset of symptoms (days)             |               |         | -0.13          | NS      | 0.13        | NS      |
| Age (years)                          | 0.19          | NS      | -0.09          | NS      | 0.09        | NS      |
| Body weight (kg)                     | -0.21         | NS      | -0.19          | NS      | -0.19       | NS      |
| Temperature (°C)                     | -0.09         | NS      | 0.12           | NS      | -0.11       | NS      |
| Hb%                                  | 0.11          | NS      | -0.03          | NS      | 0.04        | NS      |
| Platelet count (10 <sup>3</sup> /ml) | -0.05         | NS      | 0.15           | NS      | -0.09       | NS      |
| TLC (10 <sup>3</sup> /ml)            | 0.03          | NS      | -0.06          | NS      | -0.13       | NS      |
| CRP (mg/dl)                          | -0.11         | NS      | 0.14           | NS      | 0.29        | NS      |
| ASO (IU/ml)                          | 0.03          | NS      | -0.02          | NS      | 0.15        | NS      |
| Ejection fraction                    | -0.12         | NS      | 0.15           | NS      | -0.40       | 0.01    |
| Fractional shortening (%)            | 0.06          | NS      | 0.04           | NS      | -0.37       | 0.02    |

Spearman correlation coefficient test was performed. Statistically significant differences are written in bold print; NS, not significant. RHD, rheumatic heart disease; HF, heart failure; MMP-9, matrix metalloproteinase-9; ASO, antistreptolysin O; CRP, C reactive protein, Hb%, hemoglobin concentration; TLC, total leukocyte count.
